# Supplementary material for: Brain Functional Correlates of Episodic Memory Using an Ecological Free Recall Task
Source: MDPI journal article supplement (doi:10.3390/brainsci11070911), 2021-07-09
Supplement: s1 [file s1]

# Brain functional correlates of episodic memory using an ecological free-recall task

Francesco Neri<sup>1</sup>, Stefano F. Cappa<sup>2,3</sup>, Lucia Mencarelli<sup>1</sup>, Davide Momi<sup>1</sup>, Emiliano Santarnecchi<sup>4,5^</sup>, Simone Rossi<sup>1^</sup>

1. Siena Brain Investigation and Neuromodulation Lab (Si-BIN Lab), Unit of Neurology and Clinical Neurophysiology, Department of Medicine, Surgery and Neuroscience, University of Siena, Italy
2. Institute for Advanced Study, IUSS, Pavia, Italy
3. IRCCS Mondino Foundation, Pavia, Italy
4. Berenson-Allen Center for Noninvasive Brain Stimulation, Beth Israel Deaconess Medical Center, Harvard Medical School, Boston, MA, USA
5. Department of Cognitive Neurology, Harvard Medical School, Boston, USA

<sup>^</sup> co-senior authors of the manuscript

1) Methods

2) Results

## Table

Supplementary Table S1

Supplementary Table S2

Supplementary Table S3

Supplementary Table S4

## Figure

Supplementary Figure S1

Supplementary Figure S2

## Methods

Each passage was registered in Italian language. As an example, we report a passage that was listened by participants (n.1 of 8 possible prose passages). Each “concept” is shown between two vertical bars:

| Una malattia misteriosa | acceca | i daini | che vivono nei boschi | dell’Appennino Toscano. | Un virus o un veleno | non ancora identificato | provoca la distruzione del nervo ottico di questi timidi animali, | che in breve divengono incapaci di provvedere a se stessi, | precipitano nei dirupi | o vengono investiti dalle auto. | In un anno | nelle province di Pistoia | e Firenze | sono stati raccolti dieci esemplari ciechi. | Cinque nel solo mese di maggio. | Gli specialisti parlano di epidemia dilagante. | La causa della malattia è ancora sconosciuta. | I sintomi fanno pensare ad un grave avvelenamento | da metalli pesanti. | Forse questi animali hanno bevuto acqua inquinata | da discariche abusive di pile e batterie | che contengono piombo e cadmio. | La procura circondariale di Firenze ha aperto un’inchiesta | per fare luce sulle cause dell’epidemia. | Si teme che anche altri animali possano ammalarsi, | ma comunque la situazione appare abbastanza circoscritta | e sembra che non ci sia pericolo di avvelenamento | per gli abitanti della zona, | i quali comunque sono molto preoccupati. |

Total concepts: 30

| A mysterious disease | blinds | the fallow deer | living in the woods | of the Tuscan Apennines. | A virus or poison | not yet identified | causes destruction of the optic nerve of these shy animals, | who soon become unable to provide for themselves, | fall into the cliffs | or are hit by cars. | In one year | in the provinces of Pistoia | and Florence | ten blind fallow deer were collected. | Five in the month of May alone. | Specialists speak of a rampant epidemic. | The cause of the disease is still unknown. | Symptoms suggest severe poisoning | from heavy metals. | Perhaps these animals drank polluted water | from illegal dumps of cells and batteries | which contain lead and cadmium. | The district attorney of Florence has opened an investigation | to shed light on the causes of the epidemic. | There are fears that other animals may also get sick, | but the situation appears quite limited | and it seems that there is no danger of poisoning | for the inhabitants of the area, | who are still very worried. |

Total concepts: 30

## Results

**Table S1.** Questionnaire results.

|                | <i>FR/IR<br/>similarity</i> | <i>FR/DR<br/>similarity</i> | <i>FR<br/>Ability</i> | <i>Thinking<br/>Interference</i> | <i>fMRI Noise<br/>Interference</i> | <i>BC<br/>Ability</i> | <i>Tasks<br/>Interference</i> | <i>Shifting<br/>Ability</i> | <i>Visual<br/>Imagination</i> |
|----------------|-----------------------------|-----------------------------|-----------------------|----------------------------------|------------------------------------|-----------------------|-------------------------------|-----------------------------|-------------------------------|
| <i>Mean</i>    | 5,43                        | 5,79                        | 5,79                  | 1,79                             | 4,00                               | 4,64                  | 1,00                          | 5,43                        | 5,64                          |
| <i>SD</i>      | 0,76                        | 0,97                        | 0,58                  | 1,19                             | 2,04                               | 1,78                  | 0,00                          | 1,28                        | 1,01                          |
| <i>Median</i>  | 5                           | 6                           | 6                     | 1                                | 5                                  | 5                     | 1                             | 5,5                         | 6                             |
| <i>Freq. 1</i> | 0                           | 0                           | 0                     | 8                                | 2                                  | 0                     | 14                            | 0                           | 0                             |
| <i>Freq. 2</i> | 0                           | 0                           | 0                     | 3                                | 3                                  | 3                     | 0                             | 0                           | 0                             |
| <i>Freq. 3</i> | 0                           | 0                           | 0                     | 2                                | 1                                  | 1                     | 0                             | 2                           | 0                             |
| <i>Freq. 4</i> | 1                           | 1                           | 4                     | 0                                | 0                                  | 1                     | 0                             | 0                           | 2                             |
| <i>Freq. 5</i> | 7                           | 5                           | 9                     | 1                                | 3                                  | 4                     | 0                             | 5                           | 4                             |
| <i>Freq. 6</i> | 5                           | 4                           | 1                     | 0                                | 5                                  | 3                     | 0                             | 4                           | 5                             |
| <i>Freq. 7</i> | 1                           | 4                           | 0                     | 0                                | 0                                  | 0                     | 0                             | 3                           | 3                             |
| <i>Total</i>   | <b>14</b>                   | <b>14</b>                   | <b>14</b>             | <b>14</b>                        | <b>14</b>                          | <b>14</b>             | <b>14</b>                     | <b>14</b>                   | <b>14</b>                     |

**Table S2.** MNI coordinates for each region showing increased BOLD signal in the BC>FR contrast.

| <b>Activation Loci<br/>(BC&gt;FR Contrast)</b> | <b>Cluster size (voxels)</b> | <b>T</b> | <b>Coordinates (MNI)</b> |          |          |
|------------------------------------------------|------------------------------|----------|--------------------------|----------|----------|
|                                                |                              |          | <b>x</b>                 | <b>y</b> | <b>z</b> |
| <i>Right &amp; Left Parietal Cortex</i>        | 17011                        |          |                          |          |          |
| L Inferior Parietal Lobule                     |                              | 18,04    | -44                      | -40      | 44       |
| R Superior Parietal Lobule                     |                              | 17,46    | 18                       | -70      | 58       |
| R Inferior Parietal Lobule                     |                              | 18,46    | 50                       | -38      | 52       |
| <i>Right Frontal Cortex</i>                    | 3590                         |          |                          |          |          |
| R IFG (p. Triangularis)                        |                              | 13,15    | 50                       | 12       | 26       |
| R Middle Frontal Gyrus                         |                              | 12,04    | 46                       | 42       | 18       |
| R IFG (pars opercularis)                       |                              | 6,53     | 42                       | 60       | -4       |
| <i>Right Frontal Cortex</i>                    | 1472                         |          |                          |          |          |
| R Middle Frontal Gyrus                         |                              | 14,50    | 30                       | 6        | 58       |
| <i>Left Cerebellum</i>                         | 1001                         |          |                          |          |          |
| L Cerebellum (Crus 1)                          |                              | 8,30     | -8                       | -80      | -20      |
| L Cerebellum (Crus 1)                          |                              | 7,48     | -30                      | -70      | -26      |
| <i>Left Temporal Cortex</i>                    | 915                          |          |                          |          |          |
| L Inferior Temporal Gyrus                      |                              | 14,50    | -52                      | -58      | -16      |
| <i>Cingulate Cortex</i>                        | 700                          |          |                          |          |          |
| R Medial Cingulate Cortex                      |                              | 9,03     | 6                        | 14       | 50       |
| <i>Right Temporal Cortex</i>                   | 699                          |          |                          |          |          |
| R Inferior Temporal Gyrus                      |                              | 14,70    | 58                       | -54      | -14      |
| <i>Right Cerebellum</i>                        | 277                          |          |                          |          |          |
| R Cerebellum (Crus 1)                          |                              | 7,64     | 30                       | -66      | -30      |
| <i>Right Frontal Cortex</i>                    | 274                          |          |                          |          |          |
| R IFG (p. Orbitalis)                           |                              | 8,11     | 34                       | 20       | -4       |
| <i>Right Cerebellum</i>                        | 199                          |          |                          |          |          |
| R Cerebellum (VIII)                            |                              | 10,30    | 18                       | -76      | -50      |
| <i>Left Cerebellum</i>                         | 195                          |          |                          |          |          |

|                         |    |       |     |     |     |
|-------------------------|----|-------|-----|-----|-----|
| L Cerebellum            |    | 11,23 | -28 | -74 | -52 |
| Right & Left Cerebellum | 71 |       |     |     |     |
| Cerebellum              |    | 6,45  | 0   | -50 | -22 |
| Right Thalamus          | 69 |       |     |     |     |
| R Thalamus              |    | 6,14  | 8   | -18 | 8   |

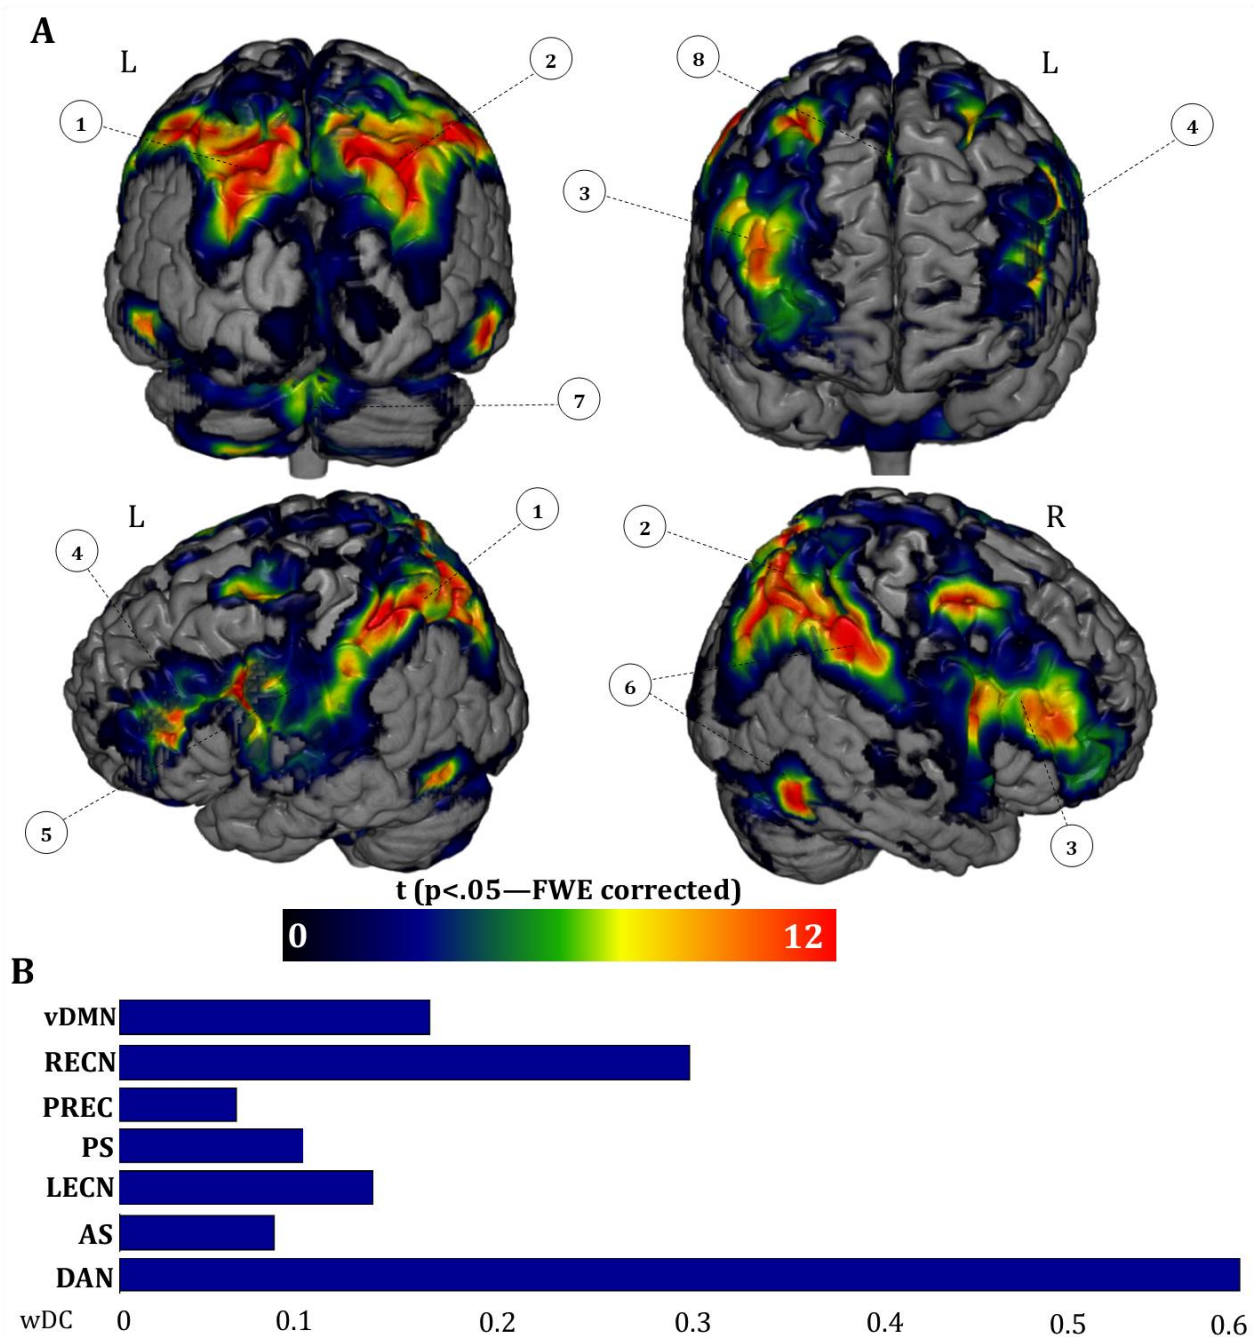

**Figure S1. Threshold activation maps of the BC>FR contrast.** Whole brain activation is displayed on the 3D rendered MNI reference brain (statistical threshold of  $p < .05$  FWE-corrected; cluster size:  $> 50$ ) **1**: Left Parietal Cortex; **2**: Right Parietal Cortex; **3**: Right Frontal Cortex **4**: Left Frontal Cortex; **5**: Left Temporal Cortex; **6**: Right Temporal Cortex; **7**: Bilateral Cerebellum; **8**: Cingulate Cortex. (A). Activation overlap with the RSNs is shown (B).

**A**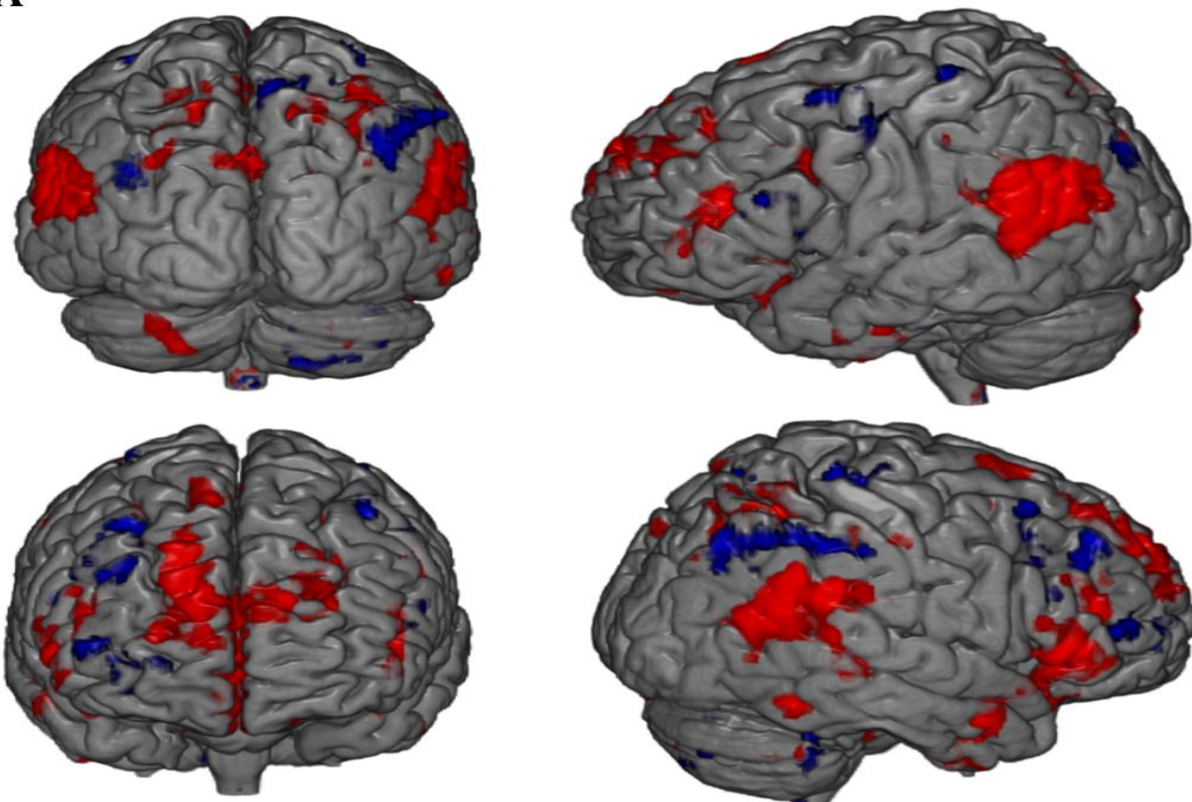**B**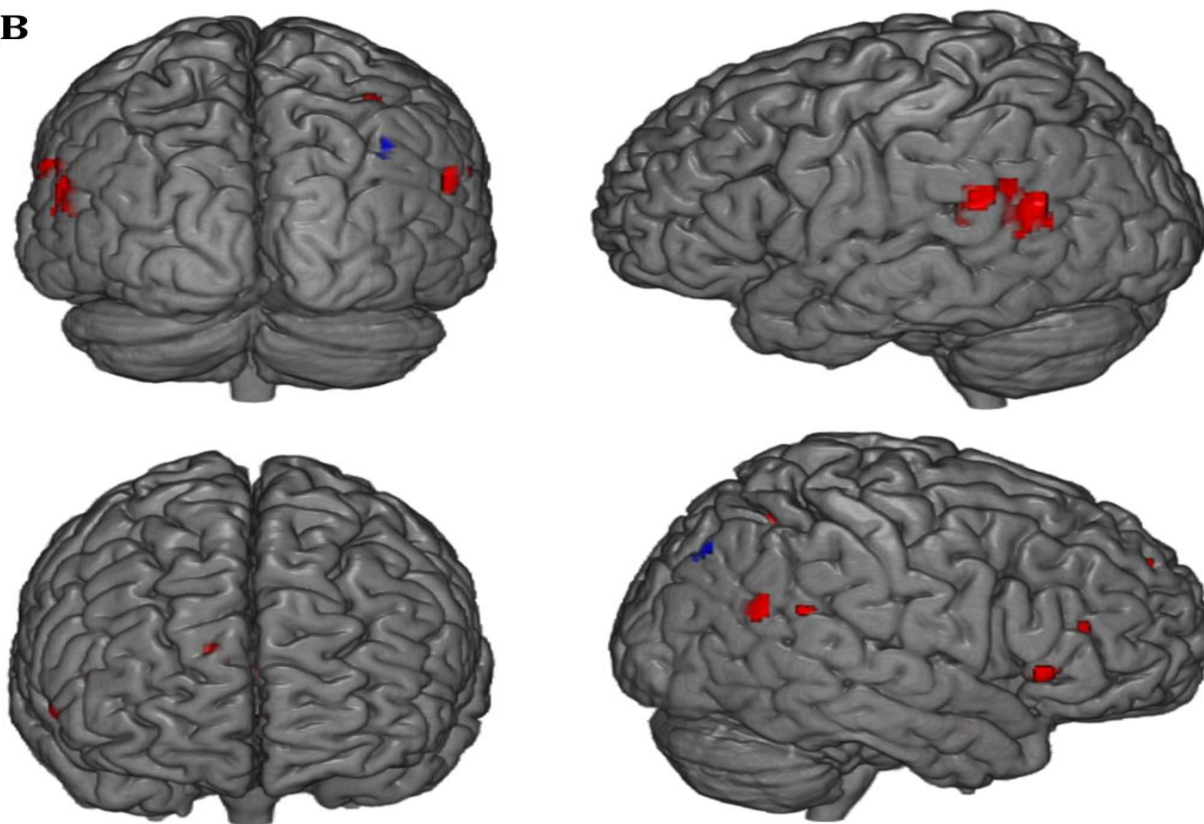

**Figure S2. Threshold activation maps of the BC>FR contrast, two sided of the MVPA analysis.** Height threshold =  $p < .05$ ; uncorrected; cluster-size FDR corrected  $p < .05$  (A). Height threshold =  $p < .05$ ; FDR corrected; cluster-size FDR corrected  $p < .05$  (B).

**Table S3.** Results Table of MVPA analysis. Height threshold =  $p < .05$ ; uncorrected; cluster-size FDR corrected  $p < .05$

| X   | Y   | Z   | size  | size p-FWE | size p-FDR | size p-unc | peak p-FWE | peak p-unc |
|-----|-----|-----|-------|------------|------------|------------|------------|------------|
| -46 | -58 | 16  | 10757 | 0.000000   | 0.000000   | 0.000000   | 0.005171   | 0.000000   |
| 10  | 54  | -6  | 8416  | 0.000000   | 0.000000   | 0.000000   | 0.023910   | 0.000000   |
| 56  | 26  | 2   | 7764  | 0.000000   | 0.000000   | 0.000000   | 0.164791   | 0.000001   |
| -54 | 10  | 36  | 1310  | 0.000000   | 0.000000   | 0.000000   | 0.999999   | 0.000020   |
| -32 | -88 | 36  | 884   | 0.000000   | 0.000000   | 0.000000   | 1          | 0.000040   |
| 48  | 38  | 18  | 585   | 0.000023   | 0.000001   | 0.000000   | 1          | 0.000022   |
| -46 | -38 | 38  | 435   | 0.000568   | 0.000030   | 0.000000   | 1          | 0.000112   |
| -22 | -84 | -38 | 347   | 0.004402   | 0.000205   | 0.000003   | 1          | 0.000070   |
| 16  | -36 | -38 | 321   | 0.008315   | 0.000345   | 0.000006   | 1          | 0.000573   |
| 32  | -46 | -6  | 285   | 0.020583   | 0.000774   | 0.000016   | 1          | 0.000400   |
| 60  | -52 | -16 | 274   | 0.027314   | 0.000929   | 0.000021   | 1          | 0.000075   |
| 36  | -22 | 58  | 271   | 0.029520   | 0.000929   | 0.000023   | 1          | 0.000116   |
| 24  | 26  | 2   | 251   | 0.049767   | 0.001461   | 0.000039   | 1          | 0.001137   |
| -26 | 10  | 54  | 208   | 0.155371   | 0.004489   | 0.000128   | 1          | 0.000071   |
| -4  | -48 | -66 | 195   | 0.218310   | 0.006111   | 0.000187   | 1          | 0.000538   |
| 28  | -76 | -42 | 191   | 0.242017   | 0.006446   | 0.000210   | 1          | 0.000086   |
| 22  | -82 | -28 | 179   | 0.327382   | 0.008682   | 0.000301   | 1          | 0.000018   |
| 24  | 50  | -8  | 176   | 0.352283   | 0.008980   | 0.000329   | 1          | 0.000884   |
| 38  | 34  | 32  | 173   | 0.378649   | 0.009321   | 0.000361   | 1          | 0.000029   |
| -36 | -30 | 66  | 169   | 0.416064   | 0.010011   | 0.000408   | 1          | 0.001867   |
| -38 | -24 | 0   | 148   | 0.647117   | 0.018461   | 0.000790   | 1          | 0.000938   |
| -36 | -30 | 66  | 169   | 0.416064   | 0.010011   | 0.000408   | 1          | 0.001867   |
| -38 | -24 | 0   | 148   | 0.647117   | 0.018461   | 0.000790   | 1          | 0.000938   |

**Table S4.** Results Table of MVPA analysis. Height threshold =  $p < .05$ ; FDR corrected; cluster-size FDR corrected  $p < .05$

| X   | Y   | Z   | size | size p-FWE | size p-FDR | size p-unc | peak p-FWE | peak p-unc |
|-----|-----|-----|------|------------|------------|------------|------------|------------|
| -46 | -58 | 16  | 343  | 0.000000   | 0.000000   | 0.000000   | 0.005171   | 0.000000   |
| 0   | -18 | 36  | 56   | 0.000000   | 0.000000   | 0.000000   | 0.147889   | 0.000001   |
| 60  | -58 | 26  | 34   | 0.000000   | 0.000000   | 0.000000   | 0.357044   | 0.000001   |
| 10  | 54  | -6  | 28   | 0.000000   | 0.000000   | 0.000000   | 0.023910   | 0.000000   |
| 56  | 26  | 2   | 24   | 0.000002   | 0.000000   | 0.000000   | 0.164791   | 0.000001   |
| 10  | 52  | 34  | 20   | 0.000011   | 0.000003   | 0.000000   | 0.624534   | 0.000003   |
| -12 | -68 | 34  | 13   | 0.000443   | 0.000093   | 0.000015   | 0.996944   | 0.000006   |
| 50  | -40 | 2   | 11   | 0.001429   | 0.000262   | 0.000048   | 0.630946   | 0.000003   |
| 36  | -52 | 56  | 8    | 0.009552   | 0.001406   | 0.000319   | 0.994514   | 0.000005   |
| 40  | -78 | 44  | 8    | 0.009552   | 0.001406   | 0.000319   | 0.999962   | 0.000013   |
| 8   | -58 | 38  | 5    | 0.080245   | 0.009424   | 0.002784   | 0.999994   | 0.000016   |
| 0   | 40  | 22  | 5    | 0.080245   | 0.009424   | 0.002784   | 1          | 0.000037   |
| 0   | 32  | 0   | 5    | 0.080245   | 0.009424   | 0.002784   | 0.999997   | 0.000017   |
| -2  | -48 | 38  | 4    | 0.171926   | 0.014542   | 0.006279   | 0.999988   | 0.000015   |
| -4  | -44 | 30  | 4    | 0.171926   | 0.014542   | 0.006279   | 0.999956   | 0.000012   |
| 48  | 38  | 18  | 4    | 0.171926   | 0.014542   | 0.006279   | 1          | 0.000022   |
| -48 | -30 | -2  | 4    | 0.171926   | 0.014542   | 0.006279   | 0.999957   | 0.000012   |
| 56  | 4   | -22 | 4    | 0.171926   | 0.014542   | 0.006279   | 1          | 0.000026   |
| 22  | -82 | -28 | 4    | 0.171926   | 0.014542   | 0.006279   | 0.999998   | 0.000018   |
| 36  | -50 | 38  | 3    | 0.366853   | 0.029104   | 0.015213   | 1          | 0.000021   |
| -42 | -2  | 30  | 3    | 0.366853   | 0.029104   | 0.015213   | 1          | 0.000021   |
| 62  | -44 | 26  | 3    | 0.366853   | 0.029104   | 0.015213   | 1          | 0.000036   |
| 52  | 2   | -28 | 3    | 0.366853   | 0.029104   | 0.015213   | 1          | 0.000037   |
